# Supplementary material for: Regulation of Constitutive Interferon-Stimulated Genes (Isgs) in Tumor Cells Contributes to Enhanced Antitumor Response of Newcastle Disease Virus-Infected Tumor Vaccines
Source: PubMed Central journal article supplement (PMC6024929; doi:10.3390/cancers10060186), 2018-06-06
Supplement: cancers-10-00186-s001.pdf [file cancers-10-00186-s001.pdf]

**Table S1.** The list of primers

| Gene                           |         | Sequence of primer                 | Accession number |
|--------------------------------|---------|------------------------------------|------------------|
| <i>GAPDH</i>                   | forward | 5'-CGTGAGTGGAGTCATACTGGAA-3'       | XM_017321385.1   |
|                                | reverse | 5'-AACGGATTTGGCCGTATTG-3'          |                  |
| <i>RIG-I</i>                   | forward | 5'-GCCCTGTACCATGCAGGTTAC-3'        | NM_172689.3      |
|                                | reverse | 5'-AGTCCCAACTTTTCGATGGCTT-3'       |                  |
| <i>TLR3</i>                    | forward | 5'-TTGCGTTGCGAAGTGAAGAA-3'         | XM_006509283.3   |
|                                | reverse | 5'-ACTTGCCAATTGTCTGGAAACA-3'       |                  |
| <i>TLR7</i>                    | forward | 5'-AATCCACAGGCTCACCCATA-3'         | XM_011247786.1   |
|                                | reverse | 5'-CAGGTACCAAGGGATGTCCT-3'         |                  |
| <i>IRF-3</i>                   | forward | 5'-GTGCCTCTCCTGACACCAAT-3'         | XM_006540995.3   |
|                                | reverse | 5'-CCAAGATCAGGCCATCAAAT-3'         |                  |
| <i>IRF-7</i>                   | forward | 5'-AAGCTGGAGCCATGGGTATG-3'         | XM_006536214.1   |
|                                | reverse | 5'-GACCCAGGTCCATGAGGAAG-3'         |                  |
| <i>IFN-<math>\alpha</math></i> | forward | 5'-CTTCCACAGGATCACTGTGTACCT-3'     | NM_010505.2      |
|                                | reverse | 5'-TTCTGCTCTGACCACCTCCC-3'         |                  |
| <i>IFN-<math>\beta</math></i>  | forward | 5'-CTGGAGCAGCTGAATGGAAAG-3'        | NM_010510.1      |
|                                | reverse | 5'-CTTCTCCGTCATCTCCATAGGG-3'       |                  |
| <i>IFN-<math>\gamma</math></i> | forward | 5'-TGAAAGCCTAGAAAGTCTGAATAAC-3'    | NM_008337.4      |
|                                | reverse | 5'-GTTGTGTGCTGATGGCCTGAT-3'        |                  |
| <i>Mx1</i>                     | forward | 5'-CCAAGTGAATCCTCCTGGAA-3'         | NR_003520.1      |
|                                | reverse | 5'-GCCGCACCTTCTCCTCATAG-3'         |                  |
| <i>Mx2</i>                     | forward | 5'-CGAGAATTGCCAGGGTTTGT-3'         | NR_003508.1      |
|                                | reverse | 5'-GGCAGCTCGTACAATTTTCAGT-3'       |                  |
| <i>OAS1a</i>                   | forward | 5'-GAAGAGGCTGATGTGTGGCT-3'         | XR_001784699.1   |
|                                | reverse | 5'-TGTCCAGTTCTTCTACCTGC-3'         |                  |
| <i>OAS1b</i>                   | forward | 5'-TTCTACGCCAATCTCATCAGTG-3'       | NR_003507.1      |
|                                | reverse | 5'-GGTCCCCCAGCTTCTCCTTAC-3'        |                  |
| <i>OAS2</i>                    | forward | 5'-AAACCTCACACCCAACGAAAA-3'        | XM_017320884.1   |
|                                | reverse | 5'-CCACCCTTAGCCACTTCCT-3'          |                  |
| <i>OAS3</i>                    | forward | 5'-CCAACCCAAGTGCCAATAAAA-3'        | NM_145226.2      |
|                                | reverse | 5'-AACATGACTTGAGATACTATCCAATGCT-3' |                  |
| <i>OASL1</i>                   | forward | 5'-TGGACCTTGGGCTCAGTAAC-3'         | XM_006530295.3   |
|                                | reverse | 5'-GCACAACGGTGACAGTGATG-3'         |                  |
| <i>OASL2</i>                   | forward | 5'-CGATGCCTGGGAGAGAATCG-3'         | XM_006530315.3   |
|                                | reverse | 5'-TCGCCTGCTCTTCGAAACTG-3'         |                  |

**Table S2.** The expression of type I IFN related genes in tumor cell lines

(a)

| Normalized<br>ratio | RIG-I         |                | TLR3          |                | TLR7          |                |
|---------------------|---------------|----------------|---------------|----------------|---------------|----------------|
|                     | Pre-infection | Post-infection | Pre-infection | Post-infection | Pre-infection | Post-infection |
| B16-1               | 1.19E-03      | 0.06           | 9.24E-03      | 0.28           | 1.16E-03      | 9.71E-04       |
| B16-2               | 1.39E-03      | 0.04           | 8.16E-03      | 0.19           | 8.84E-04      | 1.11E-03       |
| B16-3               | 1.52E-03      | 0.05           | 0.01          | 0.16           | 7.35E-04      | 4.14E-03       |
| WEHI164-1           | 5.48E-03      | 0.11           | 0.01          | 0.27           | 5.63E-03      | 0.01           |
| WEHI164-2           | 6.69E-03      | 0.11           | 0.01          | 0.3            | 7.03E-03      | 9.80E-03       |
| WEHI164-3           | 9.25E-03      | 0.14           | 0.02          | 0.62           | 0.03          | 0.05           |
| 3LL-1               | 8.64E-03      | 0.04           | 2.44E-03      | 0.01           | 6.25E-03      | 0.02           |
| 3LL-2               | 7.40E-03      | 0.03           | 4.20E-03      | 0.01           | 5.24E-03      | 0.01           |
| 3LL-3               | 7.91E-03      | 0.01           | 2.24E-03      | 4.61E-03       | 3.89E-03      | 8.29E-03       |
| SCCVII-1            | 0.03          | 0.07           | 0.02          | 0.05           | 0.05          | 6.38E-03       |
| SCCVII-2            | 0.03          | 0.07           | 0.02          | 0.04           | 0.05          | 0.01           |
| SCCVII-3            | 0.02          | 0.08           | 3.90E-03      | 0.07           | 5.78E-03      | 0.1            |
| MBT-1               | 5.79E-03      | 0.04           | 0.02          | 0.08           | 4.08E-03      | 0.02           |
| MBT-2               | 8.77E-03      | 0.04           | 0.03          | 0.08           | 8.49E-03      | 0.05           |
| MBT-3               | 6.63E-03      | 0.06           | 0.03          | 0.09           | 3.04E-03      | 0.08           |
| BALB-1              | 0.05          | 0.17           | 0.14          | 0.74           | 0.02          | 6.36E-03       |
| BALB-2              | 0.04          | 0.12           | 0.1           | 1.07           | 0.05          | 2.78E-03       |
| BALB-3              | 0.04          | 0.15           | 0.08          | 1.31           | 7.22E-03      | 0.02           |
| calibrator          | 1             | 1              | 1             | 1              | 1             | 1              |

(b)

| Normalized<br>ratio | IFN- $\beta$  |                | IFN- $\alpha$ |                | IRF-3         |                |
|---------------------|---------------|----------------|---------------|----------------|---------------|----------------|
|                     | Pre-infection | Post-infection | Pre-infection | Post-infection | Pre-infection | Post-infection |
| B16-1               | 0.02          | 0.5            | 0.04          | 0.19           | 0.02          | 0.03           |
| B16-2               | 0.04          | 0.95           | 0.24          | 0.38           | 8.56E-03      | 0.02           |
| B16-3               | 0.04          | 3.03           | 0.2           | 1.78           | 0.02          | 0.04           |
| WEHI164-1           | 0.05          | 12.95          | 0.15          | 2.84           | 0.03          | 0.07           |
| WEHI164-2           | 0.13          | 13.22          | 0.28          | 1.76           | 0.04          | 0.1            |
| WEHI164-3           | 7.44E-03      | 1.87           | 0.05          |                | 0.05          | 0.05           |
| 3LL-1               | 0.12          | 2.15           | 0.25          | 1.67           | 0.03          | 0.05           |
| 3LL-2               | 0.04          | 0.81           | 0.14          | 0.64           | 0.03          | 0.04           |
| 3LL-3               | 0.13          | 0.13           | 0.33          | 0.07           | 0.04          | 0.03           |
| SCCVII-1            | 0.02          | 1.03           | 0.04          | 0.1            | 0.08          | 0.09           |
| SCCVII-2            | 8.70E-03      | 0.88           | 0.02          | 0.07           | 0.11          | 0.09           |
| SCCVII-3            | 0.12          | 0.86           | 0.15          | 0.05           | 0.08          | 0.13           |
| MBT-1               | 0.03          | 4.66           | 0.11          | 1.99           | 0.02          | 0.05           |
| MBT-2               | 0.35          | 2.29           |               | 1.34           | 0.01          | 0.05           |
| MBT-3               | 0.09          | 19.7           | 0.18          | 26.42          | 0.02          | 0.04           |
| BALB-1              | 0.08          | 8.15           | 0.18          |                | 0.09          | 0.07           |
| BALB-2              | 0.16          | 2.48           | 0.29          | 2.58           | 0.11          | 0.18           |
| BALB-3              | 0.85          | 5.88           |               | 1.37           | 0.06          | 0.05           |
| calibrator          | 1             | 1              | 1             | 1              | 1             | 1              |

(c)

| Normalized<br>ratio | IRF-7         |                | Mx1           |                | Mx2           |                |
|---------------------|---------------|----------------|---------------|----------------|---------------|----------------|
|                     | Pre-infection | Post-infection | Pre-infection | Post-infection | Pre-infection | Post-infection |
| B16-1               | 2.52E-04      | 1.37E-03       | 2.38E-04      | 0.08           | 7.54E-03      | 5.39           |
| B16-2               | 3.15E-04      | 2.77E-03       | 2.04E-05      | 0.05           |               | 3.18           |
| B16-3               | 9.48E-04      | 8.69E-03       | 1.08E-04      | 0.16           | 7.23E-03      | 2.95           |
| WEHI164-1           | 9.09E-04      | 0.04           | 1.40E-05      | 0.04           | 8.19E-03      | 4.74           |
| WEHI164-2           | 1.80E-03      | 0.04           | 1.01E-04      | 0.03           |               | 4.58           |
| WEHI164-3           | 2.91E-04      | 0.02           | 3.84E-05      | 0.02           | 8.90E-03      | 6.83           |
| 3LL-1               | 9.71E-04      | 0.01           | 0             | 1.06E-04       | 4.05E-03      |                |
| 3LL-2               | 7.68E-04      | 4.55E-03       | 2.68E-05      | 1.34E-04       | 2.19E-03      | 0.06           |
| 3LL-3               | 1.60E-03      | 1.22E-03       | 2.20E-05      | 3.45E-05       |               | 0.13           |
| SCCVII-1            | 9.13E-04      | 9.52E-03       | 5.75E-04      | 9.22E-03       | 3.72E-03      | 3.88           |
| SCCVII-2            | 9.34E-04      | 6.95E-03       | 2.28E-04      | 3.06E-03       | 4.65E-03      | 2.85           |
| SCCVII-3            | 3.68E-03      | 0.01           | 4.75E-04      | 6.51E-03       | 1.05E-03      | 4.19           |
| MBT-1               | 8.79E-04      | 0.05           | 1.17E-04      | 4.12E-03       | 0.01          | 1.46           |
| MBT-2               | 6.87E-03      | 0.02           | 6.32E-05      | 2.61E-03       | 0.01          | 1.38           |
| MBT-3               | 1.48E-03      |                | 0             | 2.43E-03       |               | 0.01           |
| BALB-1              | 3.90E-03      | 0.1            | 3.12E-05      | 0.11           | 0.23          | 24.46          |
| BALB-2              | 4.29E-03      | 0.07           | 1.25E-03      | 0.35           | 0.17          | 16.75          |
| BALB-3              | 0.01          | 0.05           | 2.47E-04      |                | 0.12          | 22.56          |
| calibrator          | 1             | 1              | 1             | 1              | 1             | 1              |

(d)

| Normalized<br>ratio | OAS1a         |                | OAS1b         |                | OAS2          |                |
|---------------------|---------------|----------------|---------------|----------------|---------------|----------------|
|                     | Pre-infection | Post-infection | Pre-infection | Post-infection | Pre-infection | Post-infection |
| B16-1               | 0.02          | 0.88           | 4.12E-03      | 3.36           | 0.17          | 1.92           |
| B16-2               | 0.02          | 0.5            | 2.86E-03      | 2              | 0.09          | 1.2            |
| B16-3               |               | 0.58           | 9.93E-04      | 2.18           | 0.04          | 1.27           |
| WEHI164-1           | 0.05          | 0.55           | 0.03          | 5.54           | 0.25          | 1.86           |
| WEHI164-2           |               | 0.53           | 0.02          | 4.44           | 0.11          | 1.99           |
| WEHI164-3           | 0.05          | 0.9            | 0.04          | 6.39           | 0.35          | 2.37           |
| 3LL-1               | 9.48E-03      | 0.06           | 0.05          | 0.56           | 0.32          | 0.52           |
| 3LL-2               | 0.02          | 0.05           | 0.05          | 0.25           | 0.43          | 0.54           |
| 3LL-3               | 6.37E-03      | 0.07           | 0.03          | 0.59           | 0.17          | 0.84           |
| SCCVII-1            | 0.02          | 0.36           | 0.06          | 2.61           | 0.73          | 1.77           |
| SCCVII-2            | 0.03          | 0.27           | 0.11          | 1.79           | 0.92          | 1.44           |
| SCCVII-3            | 0.02          | 0.49           | 0.05          | 2.45           | 0.46          | 1.29           |
| MBT-1               | 0.01          | 0.17           | 0.18          | 1.96           | 0.42          | 0.97           |
| MBT-2               | 0.01          | 0.09           | 0.07          | 2.2            | 0.2           | 1.57           |
| MBT-3               | 0.11          | 0.02           |               | 0.18           | 1.37          | 0.65           |
| BALB-1              | 2.85          | 35.71          | 0.44          | 12.25          | 2.24          | 17.93          |
| BALB-2              | 2.99          | 27.07          | 0.47          | 8.87           | 2.12          | 15.76          |
| BALB-3              | 1.16          | 27.27          | 0.08          | 11.16          | 0.55          | 18.4           |
| calibrator          | 1             | 1              | 1             | 1              | 1             | 1              |

(e)

| Normalized<br>ratio | OAS3          |                | OASL1         |                | OASL2         |                |
|---------------------|---------------|----------------|---------------|----------------|---------------|----------------|
|                     | Pre-infection | Post-infection | Pre-infection | Post-infection | Pre-infection | Post-infection |
| B16-1               | 0.43          | 1.2            | 0.17          | 2.95           | 1.02E-05      | 6.67E-03       |
| B16-2               | 0.19          | 0.8            | 0.09          | 2.14           | 4.41E-06      | 4.48E-03       |
| B16-3               | 0.1           | 0.83           | 0.06          | 2.45           | 8.38E-06      | 0.01           |
| WEHI164-1           | 0.69          | 2.72           | 0.29          | 0.91           | 9.03E-05      | 0.04           |
| WEHI164-2           | 0.28          | 2.67           | 0.14          | 1.05           | 5.81E-05      | 0.03           |
| WEHI164-3           | 0.73          | 3.82           | 0.33          | 1.28           | 8.65E-05      | 0.02           |
| 3LL-1               | 0.79          | 1.12           | 0.84          | 2.24           | 2.41E-04      | 5.15E-03       |
| 3LL-2               | 1.02          | 0.81           | 1.15          | 1.81           | 3.72E-04      | 3.70E-03       |
| 3LL-3               | 0.47          | 1.72           | 0.57          | 2.84           | 2.59E-04      | 1.71E-03       |
| SCCVII-1            | 1.86          | 3.27           | 1.1           | 6.93           | 7.77E-04      | 0.03           |
| SCCVII-2            | 2.43          | 2.6            | 1.48          | 5.45           | 6.73E-04      | 0.03           |
| SCCVII-3            | 1.35          | 2.37           | 0.69          | 6.41           | 8.29E-04      | 0.03           |
| MBT-1               | 0.97          | 1.09           | 0.65          | 4.39           | 1.17E-03      | 0.05           |
| MBT-2               | 0.52          | 1.5            | 0.34          | 4.12           | 1.08E-03      | 0.03           |
| MBT-3               | 1.34          | 1.5            | 1.62          | 1.71           | 1.08E-03      | 0.01           |
| BALB-1              | 2.93          | 4.74           | 1.71          | 22.08          | 1.91E-03      | 0.06           |
| BALB-2              | 3.05          | 3.6            | 1.45          | 16.99          | 1.58E-03      | 0.2            |
| BALB-3              | 0.85          | 5.13           | 0.62          | 19.88          | 1.84E-03      | 0.02           |
| calibrator          | 1             | 1              | 1             | 1              | 1             | 1              |

Constitutive and rNDV-induced expression of type I IFN related genes analyzed in different tumor cell lines by qPCR. The gene expression of (a)RIG-I, TLR3,TLR7, (b)IFN- $\beta$ , IFN- $\alpha$ , IRF-3, (c)IRF-7, Mx1, Mx2, (d)OAS1a, OAS1b, OAS2, (e)OAS3, OASL1, OASL2 were measured as type I IFN related genes. The gene expression was normalized by calibrator.

(a)

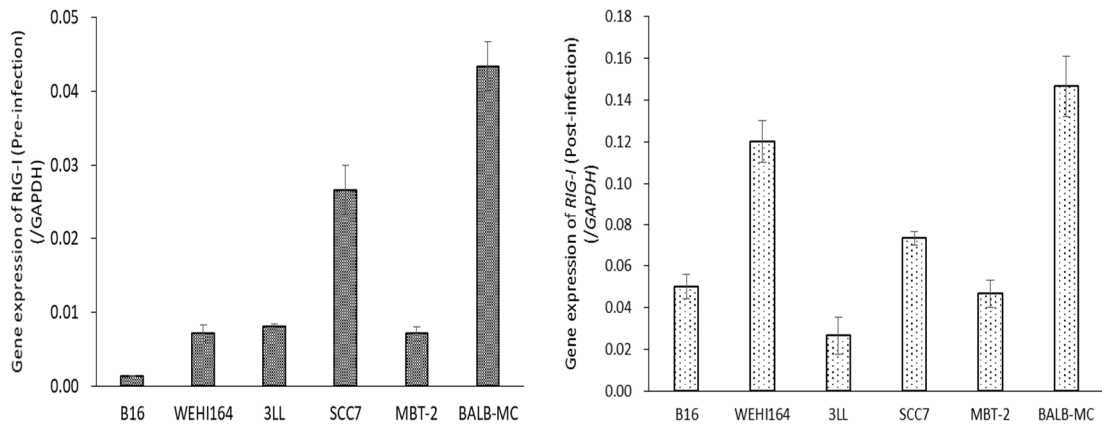

(b)

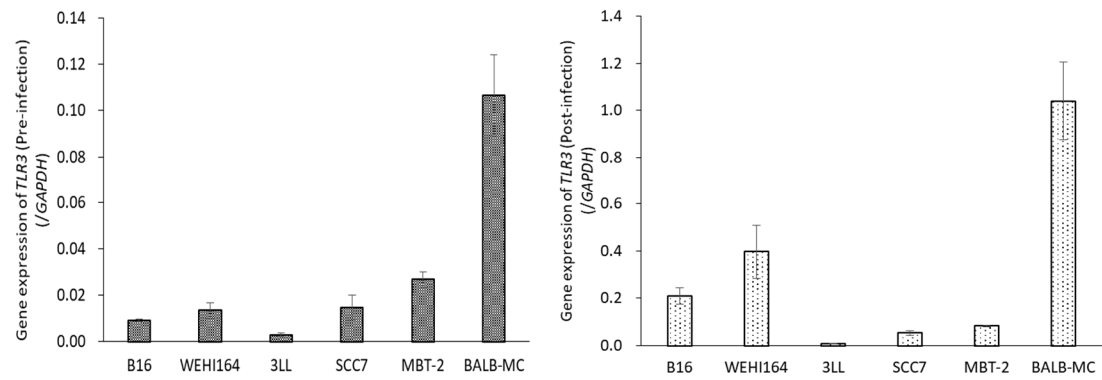

(c)

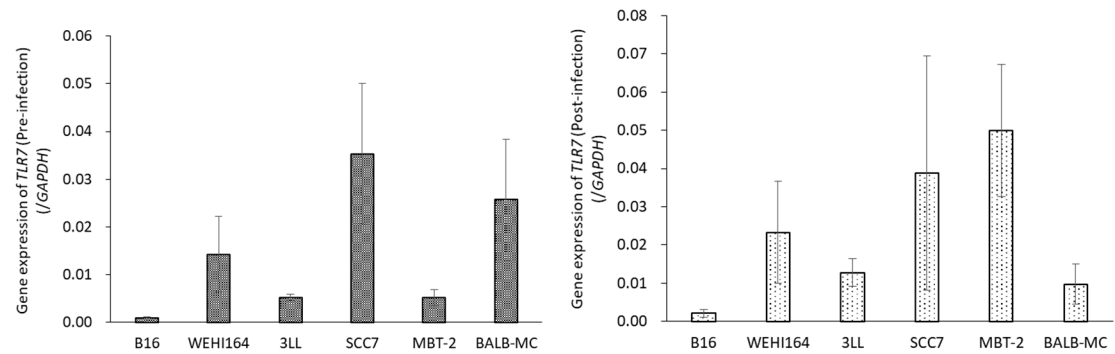

(d)

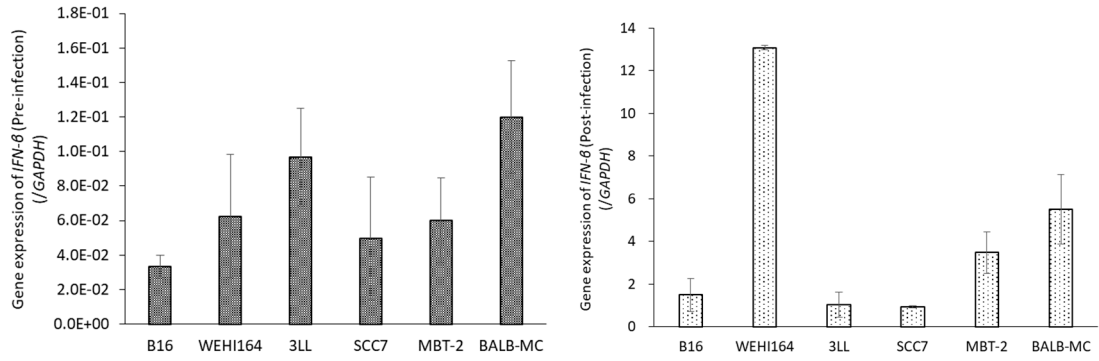

(e)

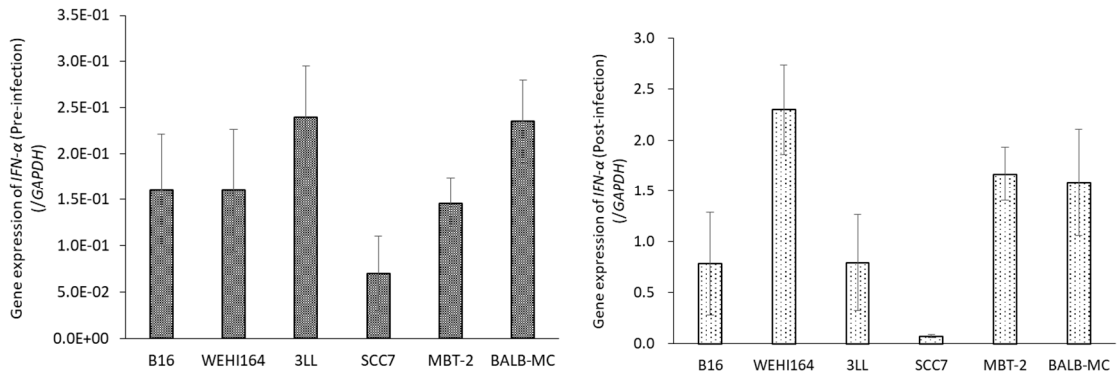

(f)

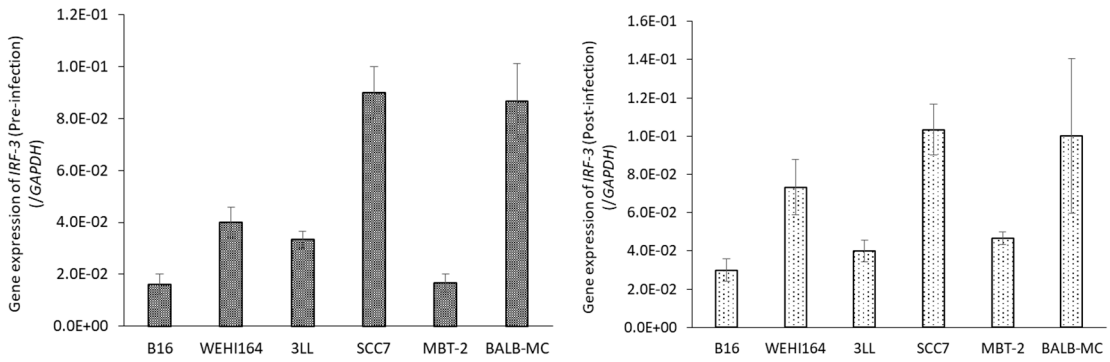



(g)

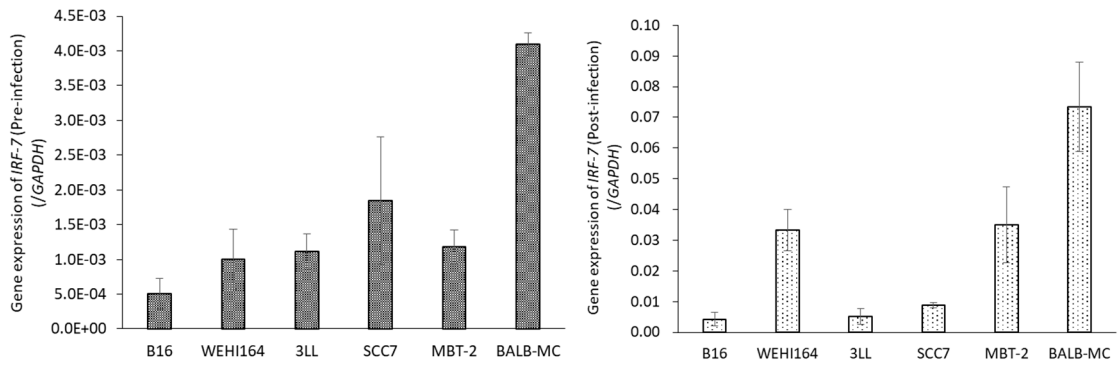

(h)

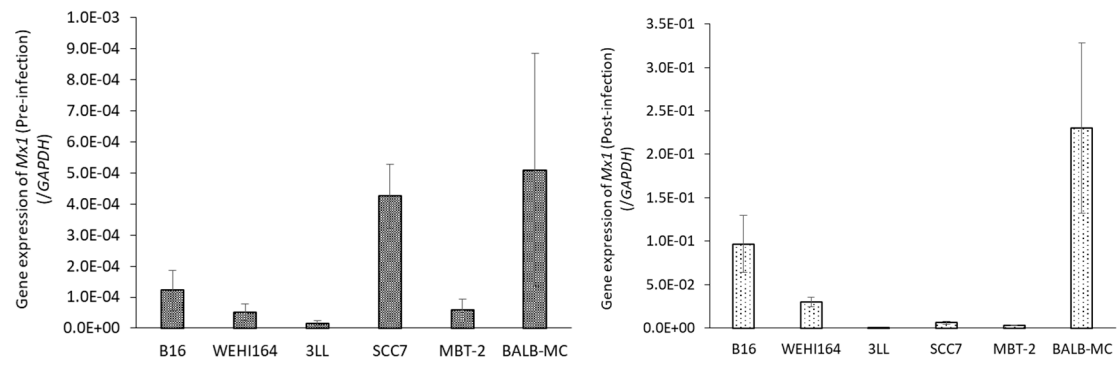

(i)

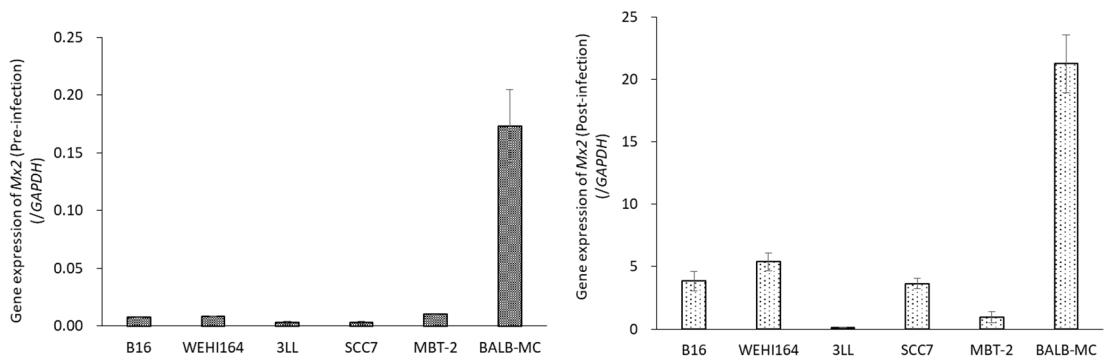

(j)

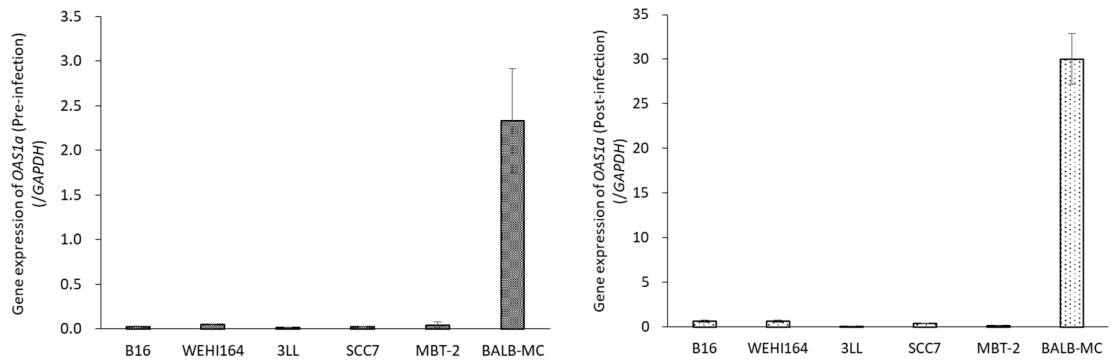

(k)

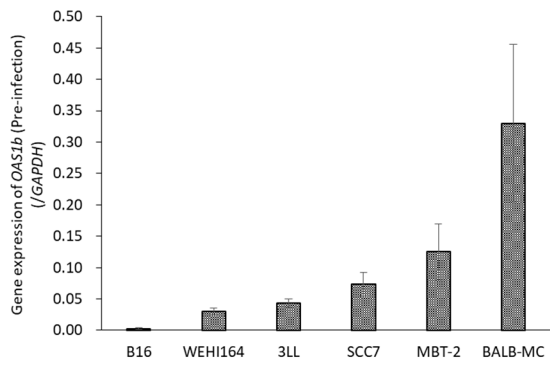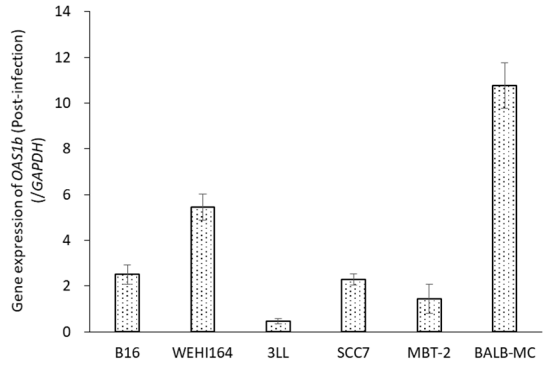

(l)

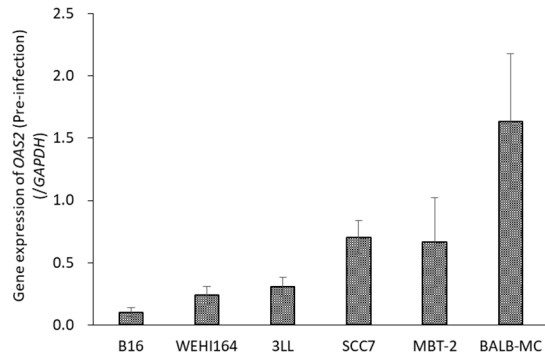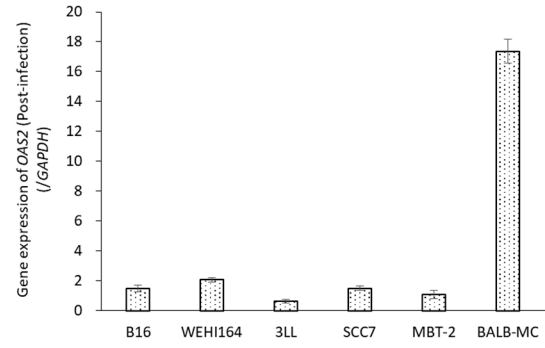

(m)

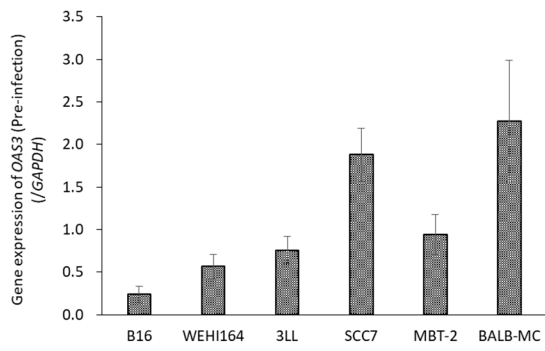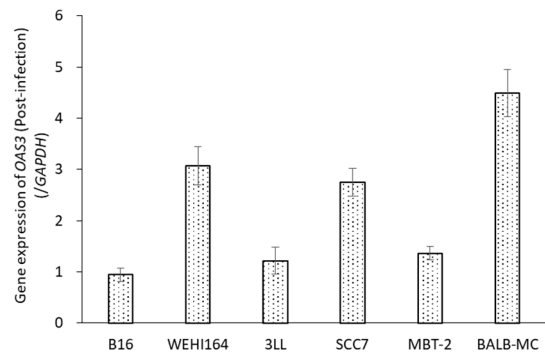

(n)

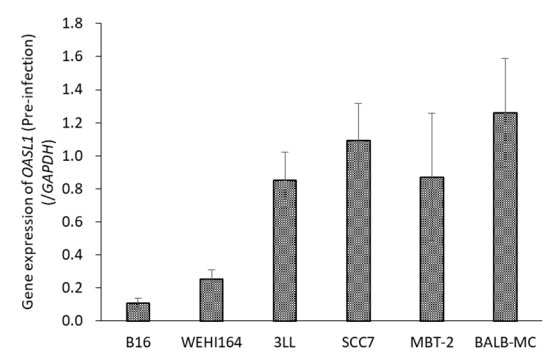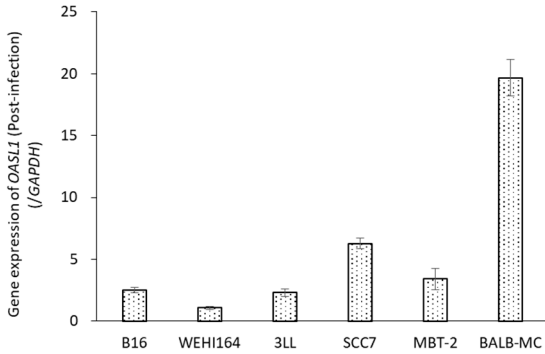

(o)

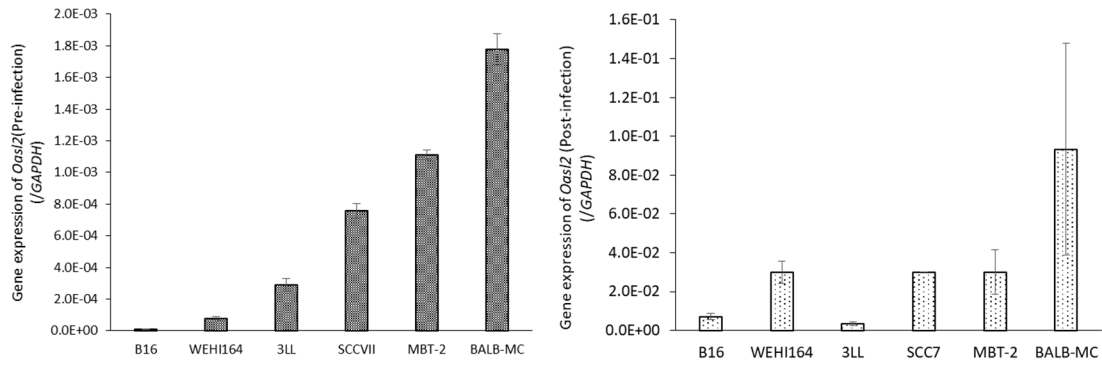

Figure S1. Constitutive and rNDV-induced expression of type I IFN related genes. (a)RIG-I, (b)TLR3, (c)TLR7, (d)IFN- $\beta$ , (e)IFN- $\alpha$ , (f)IRF-3, (g)IRF-7, (h)Mx1, (i)Mx2, (j)OAS1a, (k)OAS1b, (l)OAS2, (m)OAS3, (n)OASL1 and (o)OASL2 were measured as type I IFN related genes by qPCR (left: pre-infection, right: post-8h infection). Gene expression was normalized with GAPDH.
